# Supplementary material for: Converting IMPROVE bleeding and VTE risk assessment models into a fast-and-frugal decision tree for optimal hospital VTE prophylaxis
Source: PubMed Central journal article supplement — Blood Adv. 2024 Apr 16;8(12):3214–24. doi: 10.1182/bloodadvances.2024013166 (PMC11225674; doi:10.1182/bloodadvances.2024013166), 2024-04-16
Supplement: BLOODA_ADV-2024-013166-mmc1.pdf [file BLOODA_ADV-2024-013166-mmc1.pdf]

**Appendix 0**

**ICD-10 codes for major bleeding**

|                        |                                                                                                                                                                                                                                                                                                                                                                                                                                                                                                                                                                                                                                                                                                                                                                                                                                                                                                                                                                                                                                                                                                                                                                                                                                                                                                                                                                                                                                                                                                                                                                                                                                                                                                                                                                                                                                                                                        |
|------------------------|----------------------------------------------------------------------------------------------------------------------------------------------------------------------------------------------------------------------------------------------------------------------------------------------------------------------------------------------------------------------------------------------------------------------------------------------------------------------------------------------------------------------------------------------------------------------------------------------------------------------------------------------------------------------------------------------------------------------------------------------------------------------------------------------------------------------------------------------------------------------------------------------------------------------------------------------------------------------------------------------------------------------------------------------------------------------------------------------------------------------------------------------------------------------------------------------------------------------------------------------------------------------------------------------------------------------------------------------------------------------------------------------------------------------------------------------------------------------------------------------------------------------------------------------------------------------------------------------------------------------------------------------------------------------------------------------------------------------------------------------------------------------------------------------------------------------------------------------------------------------------------------|
| Intracranial           | I60 (Subarachnoid),<br>I61 (intracerebral),<br>I62.0 (subdural),<br>I62.1 nontraumatic extradural),<br>I62.9 (intracranial, nontraumatic, unspecified)                                                                                                                                                                                                                                                                                                                                                                                                                                                                                                                                                                                                                                                                                                                                                                                                                                                                                                                                                                                                                                                                                                                                                                                                                                                                                                                                                                                                                                                                                                                                                                                                                                                                                                                                 |
| Upper gastrointestinal | K92.0 (haematemesis),<br>K92.1 (melaena),<br>I85.0 (oesophageal varices with bleeding),<br>I98.20 (oesophageal varices in diseases classified elsewhere with bleeding),<br><br>I98.3 (Oesophageal varices with bleeding in disease classified elsewhere),<br>K22.10 (Ulcer of oesophagus, acute with bleeding),<br>K22.12 (Ulcer of oesophagus, acute with both bleeding and perforation),<br><br>K22.14 (Ulcer of oesophagus, chronic or unspecified with bleeding),<br>K22.16 (Ulcer of oesophagus, chronic or unspecified with both bleeding and perforation), K25.0 (Gastric ulcer, acute with bleeding),<br>K25.2 (Gastric ulcer, acute with both bleeding and perforation),<br><br>K25.4 (Gastric ulcer, chronic or unspecified with bleeding),<br>K25.6 (Gastric ulcer, chronic or unspecified with both bleeding and perforation),<br>K26.0 (Duodenal ulcer, acute with bleeding),<br>K26.2 (Duodenal ulcer, acute with both bleeding and perforation),<br><br>K26.4 (Duodenal ulcer, chronic or unspecified with bleeding),<br>K26.6 (Duodenal ulcer, chronic or unspecified with both bleeding and perforation),<br>K27.0 (Peptic ulcer, acute with bleeding),<br>K27.2 (Peptic ulcer, acute with both bleeding and perforation),<br><br>K27.4 (Peptic ulcer, chronic or unspecified with bleeding),<br>K27.6 (Peptic ulcer, chronic or unspecified with both bleeding and perforation),<br>K28.0 (Gastrojejunal ulcer, acute with bleeding),<br>K28.2 (Gastrojejunal ulcer, acute with both bleeding and perforation),<br>K28.4 (Gastrojejunal ulcer, chronic or unspecified with bleeding),<br>K28.6 (Gastrojejunal ulcer, chronic or unspecified with both bleeding and perforation),<br>K29.0 (Acute bleeding gastritis),<br>K63.80 (Angiodysplasia of small intestine, except duodenum with bleeding),<br>K31.80 (Angiodysplasia of stomach and duodenum with bleeding) |
| Lower GI               | K55.20 (Angiodysplasia of colon with bleeding),<br>K62.5 (bleeding of anus and rectum),<br>K92.2 (Gastrointestinal bleeding, unspecified)                                                                                                                                                                                                                                                                                                                                                                                                                                                                                                                                                                                                                                                                                                                                                                                                                                                                                                                                                                                                                                                                                                                                                                                                                                                                                                                                                                                                                                                                                                                                                                                                                                                                                                                                              |
| Other bleeding         | N02.0 (Recurrent and persistent haematuria, minor glomerular abnormality) ,<br>N02.1 (Recurrent and persistent haematuria, focal and segmental glomerular lesions),                                                                                                                                                                                                                                                                                                                                                                                                                                                                                                                                                                                                                                                                                                                                                                                                                                                                                                                                                                                                                                                                                                                                                                                                                                                                                                                                                                                                                                                                                                                                                                                                                                                                                                                    |

|  |                                                                                                                                                                                                                                                                                                                                                                                                                                                                                                                                                                                                                                                                                                                                                                                                                                                                                                                                                                                                                                                                                                                                                                                                                                                                                                                                                                                                                                                                                                          |
|--|----------------------------------------------------------------------------------------------------------------------------------------------------------------------------------------------------------------------------------------------------------------------------------------------------------------------------------------------------------------------------------------------------------------------------------------------------------------------------------------------------------------------------------------------------------------------------------------------------------------------------------------------------------------------------------------------------------------------------------------------------------------------------------------------------------------------------------------------------------------------------------------------------------------------------------------------------------------------------------------------------------------------------------------------------------------------------------------------------------------------------------------------------------------------------------------------------------------------------------------------------------------------------------------------------------------------------------------------------------------------------------------------------------------------------------------------------------------------------------------------------------|
|  | <p>N02.2 (Recurrent and persistent haematuria, diffuse membranous glomerulonephritis),<br/> N02.3 (Recurrent and persistent haematuria, diffuse mesangial proliferative glomerulonephritis),<br/> N02.4 (Recurrent and persistent haematuria, diffuse endocapillary proliferative glomerulonephritis),<br/> N02.5 (Recurrent and persistent haematuria, diffuse mesangiocapillary glomerulonephritis),<br/> N02.6 (Recurrent and persistent haematuria, dense deposit disease),<br/> N02.7 (Recurrent and persistent haematuria, diffuse crescentic glomerulonephritis),<br/> N02.8 (Recurrent and persistent haematuria, other),<br/> N02.9 (Recurrent and persistent haematuria, unspecified),<br/> K66.1 (Haemoperitoneum),<br/> N93.8 (Other specified abnormal uterine and vaginal bleeding),<br/> N93.9 (Abnormal uterine and vaginal bleeding, unspecified),<br/> N95.0 (Postmenopausal bleeding),<br/> R04.1 (bleeding from throat),<br/> R04.2 (Haemoptysis),<br/> R04.8 (bleeding from other sites in respiratory passages),<br/> R04.9 (bleeding from respiratory passages, unspecified),<br/> R31.0 (Gross hematuria),<br/> R31.1 (Microscopic hematuria),<br/> R31.8 (Other and unspecified hematuria),<br/> R58 (bleeding, not elsewhere classified),<br/> D68.3 (Haemorrhagic disorder due to circulating anticoagulants),<br/> H35.6 (Retinal bleeding),<br/> H43.1 (Vitreous bleeding),<br/> H45.0 (Vitreous bleeding in diseases classified elsewhere),<br/> M25.0 (Haemarthrosis)</p> |
|--|----------------------------------------------------------------------------------------------------------------------------------------------------------------------------------------------------------------------------------------------------------------------------------------------------------------------------------------------------------------------------------------------------------------------------------------------------------------------------------------------------------------------------------------------------------------------------------------------------------------------------------------------------------------------------------------------------------------------------------------------------------------------------------------------------------------------------------------------------------------------------------------------------------------------------------------------------------------------------------------------------------------------------------------------------------------------------------------------------------------------------------------------------------------------------------------------------------------------------------------------------------------------------------------------------------------------------------------------------------------------------------------------------------------------------------------------------------------------------------------------------------|

**Major bleeding ICD 10 Code:**

| <b>ICD10</b> | <b>Term</b>                                                  |
|--------------|--------------------------------------------------------------|
| K66.1        | Hemoperitoneum                                               |
| I31.0        | Chronic adhesive pericarditis                                |
| I60.9        | Nontraumatic subarachnoid hemorrhage, unspecified (CMS-HCC)  |
| I31.4        | Cardiac tamponade                                            |
| I31.9        | Disease of pericardium, unspecified                          |
| I61.9        | Nontraumatic intracerebral hemorrhage, unspecified (CMS-HCC) |
| E27.40       | Unspecified adrenocortical insufficiency (CMS-HCC)           |
| H44.819      | Hemophthalmos, unspecified eye                               |
| I62.1        | Nontraumatic extradural hemorrhage (CMS-HCC)                 |
| I31.8        | Other specified diseases of pericardium                      |
| I31.1        | Chronic constrictive pericarditis                            |
| I62.00       | Nontraumatic subdural hemorrhage, unspecified (CMS-HCC)      |
| I31.2        | Hemopericardium, not elsewhere classified                    |
| E27.1        | Primary adrenocortical insufficiency (CMS-HCC)               |
| H35.60       | Retinal hemorrhage, unspecified eye                          |

|       |                                                             |
|-------|-------------------------------------------------------------|
| I62.9 | Nontraumatic intracranial hemorrhage, unspecified (CMS-HCC) |
| E27.2 | Addisonian crisis (CMS-HCC)                                 |

**Non- Major (clinically significant) bleeding ICD 10 Code:**

| <b>ICD10</b> | <b>Term</b>                                                                    |
|--------------|--------------------------------------------------------------------------------|
| R04.1        | Hemorrhage from throat                                                         |
| R58          | Hemorrhage, not elsewhere classified                                           |
| K76.1        | Chronic passive congestion of liver                                            |
| K26.0        | Acute duodenal ulcer with hemorrhage                                           |
| K86.1        | Other chronic pancreatitis                                                     |
| K25.6        | Chronic or unspecified gastric ulcer with both hemorrhage and perforation      |
| K29.91       | Gastroduodenitis, unspecified, with bleeding                                   |
| K94.09       | Other complications of colostomy                                               |
| I85.01       | Esophageal varices with bleeding (CMS-HCC)                                     |
| R04.2        | Hemoptysis                                                                     |
| M25.00       | Hemarthrosis, unspecified joint                                                |
| K57.31       | Diverticulosis of large intestine without perforation or abscess with bleeding |
| K29.51       | Unspecified chronic gastritis with bleeding                                    |
| M25.076      | Hemarthrosis, unspecified foot                                                 |
| S36.029A     | Unspecified contusion of spleen, initial encounter                             |
| K31.89       | Other diseases of stomach and duodenum                                         |
| K05.5        | Other periodontal diseases                                                     |
| K29.60       | Other gastritis without bleeding                                               |
| K64.5        | Perianal venous thrombosis                                                     |
| I85.11       | Secondary esophageal varices with bleeding (CMS-HCC)                           |
| K28.2        | Acute gastrojejunal ulcer with both hemorrhage and perforation (CMS-HCC)       |
| M25.073      | Hemarthrosis, unspecified ankle                                                |
| S36.112A     | Contusion of liver, initial encounter                                          |
| K64.9        | Unspecified hemorrhoids                                                        |
| K29.81       | Duodenitis with bleeding                                                       |
| K13.70       | Unspecified lesions of oral mucosa                                             |
| K26.4        | Chronic or unspecified duodenal ulcer with hemorrhage                          |
| K62.5        | Hemorrhage of anus and rectum                                                  |
| K27.0        | Acute peptic ulcer, site unspecified, with hemorrhage                          |
| R47.01       | Aphasia                                                                        |
| K26.6        | Chronic or unspecified duodenal ulcer with both hemorrhage and perforation     |
| K29.41       | Chronic atrophic gastritis with bleeding                                       |
| N00.9        | Acute nephritic syndrome with unspecified morphologic changes                  |
| K22.6        | Gastro-esophageal laceration-hemorrhage syndrome                               |

|        |                                                                                |
|--------|--------------------------------------------------------------------------------|
| K64.4  | Residual hemorrhoidal skin tags                                                |
| K25.2  | Acute gastric ulcer with both hemorrhage and perforation (CMS-HCC)             |
| K57.11 | Diverticulosis of small intestine without perforation or abscess with bleeding |
| R31.0  | Gross hematuria                                                                |
| K66.1  | Hemoperitoneum                                                                 |
| K57.33 | Diverticulitis of large intestine without perforation or abscess with bleeding |
| K29.61 | Other gastritis with bleeding                                                  |
| K06.1  | Gingival enlargement                                                           |
| M26.79 | Other specified alveolar anomalies                                             |
| K06.2  | Gingival and edentulous alveolar ridge lesions associated with trauma          |
| K76.89 | Other specified diseases of liver                                              |
| K25.4  | Chronic or unspecified gastric ulcer with hemorrhage                           |
| K28.4  | Chronic or unspecified gastrojejunal ulcer with hemorrhage                     |
| K29.71 | Gastritis, unspecified, with bleeding                                          |
| M79.81 | Nontraumatic hematoma of soft tissue                                           |
| I88.1  | Chronic lymphadenitis, except mesenteric                                       |
| K64.8  | Other hemorrhoids                                                              |
| R31.1  | Benign essential microscopic hematuria                                         |
| R04.89 | Hemorrhage from other sites in respiratory passages                            |
| K25.0  | Acute gastric ulcer with hemorrhage                                            |
| K29.90 | Gastroduodenitis, unspecified, without bleeding                                |
| K22.11 | Ulcer of esophagus with bleeding                                               |
| K29.50 | Unspecified chronic gastritis without bleeding                                 |
| K29.00 | Acute gastritis without bleeding                                               |
| K57.13 | Diverticulitis of small intestine without perforation or abscess with bleeding |
| K29.80 | Duodenitis without bleeding                                                    |
| K27.4  | Chronic or unspecified peptic ulcer, site unspecified, with hemorrhage         |
| R04.9  | Hemorrhage from respiratory passages, unspecified                              |
| N32.89 | Other specified disorders of bladder                                           |
| I86.8  | Varicose veins of other specified sites                                        |
| K28.0  | Acute gastrojejunal ulcer with hemorrhage                                      |
| K13.79 | Other lesions of oral mucosa                                                   |
| I85.10 | Secondary esophageal varices without bleeding (CMS-HCC)                        |
| K29.40 | Chronic atrophic gastritis without bleeding                                    |
| K29.70 | Gastritis, unspecified, without bleeding                                       |
| K92.0  | Hematemesis                                                                    |
| K31.82 | Dieulafoy lesion (hemorrhagic) of stomach and duodenum                         |
| K29.21 | Alcoholic gastritis with bleeding                                              |
| K29.20 | Alcoholic gastritis without bleeding                                           |

|         |                                                                                                       |
|---------|-------------------------------------------------------------------------------------------------------|
| K27.6   | Chronic or unspecified peptic ulcer, site unspecified, with both hemorrhage and perforation (CMS-HCC) |
| N89.8   | Other specified noninflammatory disorders of vagina                                                   |
| R31.9   | Hematuria, unspecified                                                                                |
| K29.01  | Acute gastritis with bleeding                                                                         |
| M25.069 | Hemarthrosis, unspecified knee                                                                        |

**Definition of major and clinically relevant bleeding**

| Major Bleeding Event                  | Clinically Relevant Non-major Bleeding Events          |
|---------------------------------------|--------------------------------------------------------|
| Contributing to death                 | Overt non-major GI bleeding                            |
| Hemoglobin drop >2 g/dL               | Gross hematuria                                        |
| Transfused >2 units PRBCs             | Epistaxis requiring intervention                       |
| Bleeding in a critical organ or space | Extensive hematoma >5cm                                |
|                                       | Intra-articular                                        |
|                                       | Menorrhagia/metrorrhagia                               |
|                                       | Other bleeding significant enough to be noted in chart |

Schulman S, Kearon C on behalf of the subcommittee on control of anticoagulation of the Scientific and Standardization committee of the International Society on Thrombosis and Haemostasis. Definition of major bleeding in clinical investigations of antihemostatic medicinal products in non-surgical patients. Scientific and Standardization Committee Communication. *J Thromb Haemost* 2005; 3: 692–4.

Franco L, Becattini C, Beyer-Westendorf J, et al. Definition of major bleeding: Prognostic classification. *J Thromb Haemost*. 2020;18:2852–2860. <https://doi.org/10.1111/jth.15048>

## ICD-10 code list for VTE

|       |                                                                           |
|-------|---------------------------------------------------------------------------|
| I26.0 | Pulmonary embolism with mention of acute cor pulmonale                    |
| I26.9 | Pulmonary embolism without mention of acute cor pulmonale                 |
| I80.1 | Phlebitis and thrombophlebitis of femoral vein                            |
| I80.2 | Phlebitis and thrombophlebitis of other deep vessels of lower extremities |
| I80.3 | Phlebitis and thrombophlebitis of lower extremities, unspecified          |
| I80.8 | Phlebitis and thrombophlebitis of other sites                             |
| I80.9 | Phlebitis and thrombophlebitis of unspecified site                        |
| I82.0 | Budd-Chiari syndrome                                                      |
| I82.1 | Thrombophlebitis migrans                                                  |
| I82.2 | Embolism and thrombosis of vena cava                                      |
| I82.3 | Embolism and thrombosis of renal vein                                     |
| I82.8 | Embolism and thrombosis of other specified veins                          |
| I82.9 | Embolism and thrombosis of unspecified vein                               |
| O08.2 | Embolism following abortion and ectopic and molar pregnancy               |
| O22.3 | Deep phlebothrombosis in pregnancy                                        |
| O87.1 | Deep phlebothrombosis in the puerperium                                   |
| O88.2 | Obstetric blood-clot embolism                                             |
| I81   | Portal vein thrombosis                                                    |

### Cerebral venous thrombosis:

163.6 Cerebral infarction due to cerebral venous thrombosis, non-pyogenic

167.6 Non-pyogenic thrombosis of intracranial venous system

O22.5 Cerebral venous thrombosis in pregnancy

**ICD-10 code list for VTE (cont):**

| <b>ICD10</b> | <b>Term</b>                                                                                              |
|--------------|----------------------------------------------------------------------------------------------------------|
| I82.421      | Acute embolism and thrombosis of right iliac vein (CMS-HCC)                                              |
| I80.203      | Phlebitis and thrombophlebitis of unspecified deep vessels of lower extremities, bilateral (CMS-HCC)     |
| I26.92       | Saddle embolus of pulmonary artery without acute cor pulmonale (CMS-HCC)                                 |
| I80.201      | Phlebitis and thrombophlebitis of unspecified deep vessels of right lower extremity (CMS-HCC)            |
| I80.209      | Phlebitis and thrombophlebitis of unspecified deep vessels of unspecified lower extremity (CMS-HCC)      |
| I82.413      | Acute embolism and thrombosis of femoral vein, bilateral (CMS-HCC)                                       |
| I80.232      | Phlebitis and thrombophlebitis of left tibial vein (CMS-HCC)                                             |
| I82.401      | Acute embolism and thrombosis of unspecified deep veins of right lower extremity (CMS-HCC)               |
| I82.411      | Acute embolism and thrombosis of right femoral vein (CMS-HCC)                                            |
| I82.419      | Acute embolism and thrombosis of unspecified femoral vein (CMS-HCC)                                      |
| I82.403      | Acute embolism and thrombosis of unspecified deep veins of lower extremity, bilateral (CMS-HCC)          |
| I82.429      | Acute embolism and thrombosis of unspecified iliac vein (CMS-HCC)                                        |
| I26.09       | Other pulmonary embolism with acute cor pulmonale (CMS-HCC)                                              |
| I82.412      | Acute embolism and thrombosis of left femoral vein (CMS-HCC)                                             |
| I82.4Y3      | Acute embolism and thrombosis of unspecified deep veins of proximal lower extremity, bilateral (CMS-HCC) |
| I80.10       | Phlebitis and thrombophlebitis of unspecified femoral vein (CMS-HCC)                                     |
| I80.13       | Phlebitis and thrombophlebitis of femoral vein, bilateral (CMS-HCC)                                      |
| I82.402      | Acute embolism and thrombosis of unspecified deep veins of left lower extremity (CMS-HCC)                |
| I82.422      | Acute embolism and thrombosis of left iliac vein (CMS-HCC)                                               |

|         |                                                                                                           |
|---------|-----------------------------------------------------------------------------------------------------------|
| I82.423 | Acute embolism and thrombosis of iliac vein, bilateral (CMS-HCC)                                          |
| I82.431 | Acute embolism and thrombosis of right popliteal vein (CMS-HCC)                                           |
| I82.432 | Acute embolism and thrombosis of left popliteal vein (CMS-HCC)                                            |
| I82.433 | Acute embolism and thrombosis of popliteal vein, bilateral (CMS-HCC)                                      |
| I82.4Y2 | Acute embolism and thrombosis of unspecified deep veins of left proximal lower extremity (CMS-HCC)        |
| I82.4Y9 | Acute embolism and thrombosis of unspecified deep veins of unspecified proximal lower extremity (CMS-HCC) |
| I26.99  | Other pulmonary embolism without acute cor pulmonale (CMS-HCC)                                            |
| I80.202 | Phlebitis and thrombophlebitis of unspecified deep vessels of left lower extremity (CMS-HCC)              |
| I82.409 | Acute embolism and thrombosis of unspecified deep veins of unspecified lower extremity (CMS-HCC)          |
| I82.439 | Acute embolism and thrombosis of unspecified popliteal vein (CMS-HCC)                                     |
| I82.4Y1 | Acute embolism and thrombosis of unspecified deep veins of right proximal lower extremity (CMS-HCC)       |
| I26.02  | Saddle embolus of pulmonary artery with acute cor pulmonale (CMS-HCC)                                     |
| I80.11  | Phlebitis and thrombophlebitis of right femoral vein (CMS-HCC)                                            |
| I80.12  | Phlebitis and thrombophlebitis of left femoral vein (CMS-HCC)                                             |
| I80.211 | Phlebitis and thrombophlebitis of right iliac vein (CMS-HCC)                                              |
| I80.292 | Phlebitis and thrombophlebitis of other deep vessels of left lower extremity (CMS-HCC)                    |



## Appendix 1

### Converting IMPROVE bleeding and venous thromboembolism (VTE) risk assessment models into a fast-and-frugal decision tree for optimal VTE prophylaxis

#### A) Best-evidence approach<sup>1,2</sup>

We simulated a cohort of 1 million people at the risk of developing VTE in-patients per the original IMPROVE report at 0.011 (1.1%).

Using the IMPROVE model, we

1. Divided the patients into three VTE groups<sup>3</sup>:
  - Group 1: patients with VTE risk score = 0 or 1: Probability of VTE recurrence = 0.5% (69% of all patients)
  - Group 2: patients with VTE risk score = 2 or 3: Probability of VTE recurrence = 1.5%
  - Group 3: patients with VTE risk score  $\geq 4$  : Probability of VTE recurrence = 5.7%
2. Divided the patients into two bleeding groups<sup>4</sup>:
  - Group 1: patients with bleeding risk score < 7: Probability of bleeding = 1.5% (90% of all patients)
  - Group 2: patients with bleeding risk score  $\geq 7$ : Probability of bleeding = 7.9%

Based on the best evidence as reported in the ASH VTE prophylaxis guidelines, we assumed that the prophylaxis with anticoagulants (e.g., enoxaparin 30 mg bid, or enoxaparin 40 mg qd) will reduce risk of VTE by RRR (relative risk reduction) = 0.41, but at increased risk of major and clinically significant bleeding compared with no prophylaxis by RRI (relative risk increase) = 0.48. We used these estimates to calculate the decision threshold at each cue according to equation 1) shown in the manuscript.

We assumed that VTE and bleeding were independent events.

Using these “best evidence” assumptions, we simulated trajectory and counted the number of patients who experienced bleeding and VTE events according to 10 different VTE prophylaxis strategies as explained in the Method section of the paper and shown graphically in the impact graphs.<sup>5,6</sup>

#### B) “Learning health system” approach

We performed a similar analysis as above but obtained prognostic score distributions from our MUSC population while assuming the applicability of the best available evidence as per ASH guidelines.

#### C) “Real-world data” approach

Finally, we conducted the same analysis as above but relied only on the MUSC data.

## Appendix 2

### Table 1A Categorization of the Intensity of anticoagulation

[prophylactic-, intermediate-, and therapeutic-intensity anticoagulation]

(<https://ashpublications.org/bloodadvances/article/5/3/872/475154/American-Society-of-Hematology-2021-guidelines-on>)

| Table 3. Classification of anticoagulant regimens by intensity                                          |  |
|---------------------------------------------------------------------------------------------------------|--|
| Regimen                                                                                                 |  |
| <b>Prophylactic*</b>                                                                                    |  |
| Apixaban 2.5 mg, PO BID (with intent for VTE prophylaxis)                                               |  |
| Bemiparin 3500 U, SC OD                                                                                 |  |
| Betrixaban 80 mg, PO OD                                                                                 |  |
| Betrixaban 160 mg, PO OD                                                                                |  |
| Dabigatran 220 mg, PO OD                                                                                |  |
| Dalteparin 5000 U, SC OD                                                                                |  |
| Enoxaparin 30 mg (3000 U), SC OD (for GFR 15-30)                                                        |  |
| Enoxaparin 30 mg (3000 U), SC BID (for BMI $\geq 40$ kg/m <sup>2</sup> )                                |  |
| Enoxaparin 40 mg (4000 U), SC OD                                                                        |  |
| Enoxaparin 40 mg (4000 U), SC BID (for BMI $\geq 40$ kg/m <sup>2</sup> )                                |  |
| Fondaparinux 2.5 mg, SC OD                                                                              |  |
| Unfractionated heparin 5000 U, SC BID                                                                   |  |
| Unfractionated heparin 5000 U, SC TID                                                                   |  |
| Unfractionated heparin 7500 U, SC BID (for BMI $\geq 40$ kg/m <sup>2</sup> )                            |  |
| Nadroparin 2850 U, SC q24h (post-op general surgery)                                                    |  |
| Nadroparin 5700 U, SC q24h (high-risk medical patients >70 kg)                                          |  |
| Nadroparin 3800 U, SC q24h (high-risk medical patients $\leq 70$ kg or post-op hip replacement surgery) |  |
| Rivaroxaban 10 mg, PO OD                                                                                |  |
| Tinzaparin 3500 U, SC OD                                                                                |  |
| Tinzaparin 4500 U, SC OD                                                                                |  |
| Tinzaparin 75 U/kg, SC OD                                                                               |  |
| <b>Intermediate*</b>                                                                                    |  |
| Enoxaparin 0.5 mg/kg (50 U/kg), SC BID (if CrCl >30 mL/min)                                             |  |
| Enoxaparin 0.5 mg/kg (50 U/kg), SC OD (if CrCl <30 mL/min)                                              |  |
| Enoxaparin 30 mg (3000 U), SC BID (for BMI <40 kg/m <sup>2</sup> )                                      |  |
| Enoxaparin 40 mg (4000 U), SC BID (for CrCl >30 mL/min and BMI <40 kg/m <sup>2</sup> )                  |  |
| Enoxaparin 60 mg (6000 U), SC BID (for CrCl >30 mL/min and BMI >40 kg/m <sup>2</sup> )                  |  |
| Unfractionated heparin 7500 U, SC TID                                                                   |  |
| Dalteparin 5000 U, SC BID                                                                               |  |

| Therapeutic*                                                                                                                  |  |
|-------------------------------------------------------------------------------------------------------------------------------|--|
| Acenocoumarol, PO (target INR 2.0-3.0 or greater)                                                                             |  |
| Apixaban 5 mg, PO BID                                                                                                         |  |
| Apixaban 10 mg, PO BID                                                                                                        |  |
| Argatroban, IV to target aPTT therapeutic range as per institutional guidelines                                               |  |
| Bemiparin 5000 U, SC OD (if weight $\leq 50$ kg and CrCl >30 mL/min)                                                          |  |
| Bemiparin 7500 U, SC OD (if weight 50-70 kg and CrCl >30 mL/min)                                                              |  |
| Bemiparin 10000 U, SC OD (if weight 70-100 kg and CrCl >30 mL/min)                                                            |  |
| Bemiparin 115 U/kg, SC OD (if weight >100 kg and CrCl >30 mL/min)                                                             |  |
| Bivalirudin, IV to target aPTT therapeutic range as per institutional guidelines                                              |  |
| Dabigatran 75 mg, PO BID (if CrCl 15-30 mL/min)                                                                               |  |
| Dabigatran 110 mg, PO BID (AF: age $\geq 80$ y, or >75 y and 1 or more risk factors for bleeding)                             |  |
| Dabigatran 150 mg, PO BID (if CrCl >30 mL/min)                                                                                |  |
| Dalteparin 100 U/kg, SC BID                                                                                                   |  |
| Dalteparin 150 U/kg, SC OD                                                                                                    |  |
| Dalteparin 200 U/kg, SC OD                                                                                                    |  |
| Edoxaban 30 mg, PO OD ( $\leq 60$ kg, CrCl 15-50 mL/min)                                                                      |  |
| Edoxaban 60 mg, PO OD (weight $\geq 60$ kg and CrCl >50 mL/min)                                                               |  |
| Enoxaparin 0.8 mg/kg, SC BID (for BMI >40 and CrCl >30 mL/min)                                                                |  |
| Enoxaparin 1 mg/kg (100 U/kg), SC BID (for CrCl >30 mL/min)                                                                   |  |
| Enoxaparin 1.5 mg/kg (150 U/kg), SC OD (for CrCl >30 mL/min)                                                                  |  |
| Enoxaparin 1 mg/kg (100 U/kg), SC OD (for CrCl <30 mL/min)                                                                    |  |
| Tinzaparin 175 U/kg, SC OD                                                                                                    |  |
| Fluidione, PO (target INR 2.0-3.0 or greater)                                                                                 |  |
| Fondaparinux 5 mg, SC OD (if weight <50 and CrCl >50 mL/min)                                                                  |  |
| Fondaparinux 5 mg, SC OD (if weight 50-100 kg and CrCl 30-50 mL/min)                                                          |  |
| Fondaparinux 7.5 mg, SC OD (if weight 50-100 kg and CrCl >50 mL/min)                                                          |  |
| Fondaparinux 7.5 mg, SC OD (if weight >100 kg and CrCl 30-50 mL/min)                                                          |  |
| Fondaparinux 10 mg, SC OD (if weight >100 kg and CrCl >30 mL/min)                                                             |  |
| Unfractionated heparin, IV to target aPTT therapeutic range as per institutional guidelines or anti-Xa activity 0.3-0.7 IU/mL |  |
| Unfractionated heparin 250 U/kg, SC q12h                                                                                      |  |
| Nadroparin 86 U/kg, SC q12h (for acute coronary syndrome)                                                                     |  |
| Nadroparin 171 U/kg, q24h (for DVT treatment)                                                                                 |  |
| Phenprocoumon, PO (target INR 2.0-3.0 or greater)                                                                             |  |
| Rivaroxaban 15 mg, PO BID                                                                                                     |  |
| Rivaroxaban 15 mg, PO OD (for GFR 15-50 in AF patients)                                                                       |  |
| Rivaroxaban 20 mg, PO OD                                                                                                      |  |
| Warfarin, PO (target INR 2.0-3.0 or greater)                                                                                  |  |

AF, atrial fibrillation; aPTT, activated partial thromboplastin time; BID, twice daily; BMI, body mass index; CrCl, creatinine clearance; GFR, glomerular filtration rate; INR, international normalized ratio; OD, once a day; PO, oral; post-op, postoperative; q12h, every 12 hours; q24h, every 24 hours; SC, subcutaneous; TID, 3 times a day.

\*Intensity of anticoagulation.

**Table 1B antiplatelet combinations without aspirin, heparin flushes and thrombolytics (alteplase) for treatment of thrombotically occluded catheters included in the control arm\***

| anti-plate-combo/noASA                                                                                               | Total |
|----------------------------------------------------------------------------------------------------------------------|-------|
| ALTEPLASE 2 MG INTRA-CATHETER SOLUTION                                                                               | 6     |
| ALTEPLASE 2 MG INTRA-CATHETER SOLUTION; CLOPIDOGREL 75 MG TABLET; HEPARIN (PORCINE) 1,000 UNIT/ML INJECTION SOLUTION | 1     |
| ALTEPLASE 2 MG INTRA-CATHETER SOLUTION; HEPARIN (PORCINE) 1,000 UNIT/ML INJECTION SOLUTION                           | 4     |
| ALTEPLASE 2 MG INTRA-CATHETER SOLUTION; HEPARIN, PORCINE (PF) 1,000 UNIT/ML INJECTION SOLUTION                       | 1     |
| ALTEPLASE 2 MG INTRA-CATHETER SOLUTION; HEPARIN, PORCINE (PF) 10 UNIT/ML INTRAVENOUS SYRINGE                         | 3     |
| ALTEPLASE 2 MG INTRA-CATHETER SOLUTION; HEPARIN, PORCINE (PF) 100 UNIT/ML INTRAVENOUS SYRINGE                        | 1     |
| CLOPIDOGREL 300 MG TABLET; HEPARIN (PORCINE) 1,000 UNIT/ML INJECTION SOLUTION                                        | 1     |
| CLOPIDOGREL 75 MG TABLET                                                                                             | 12    |
| HEPARIN (PORCINE) 1,000 UNIT/ML INJECTION SOLUTION; ALTEPLASE 2 MG INTRA-CATHETER SOLUTION                           | 7     |
| HEPARIN (PORCINE) 1,000 UNIT/ML INJECTION SOLUTION; CLOPIDOGREL 75 MG TABLET                                         | 1     |
| HEPARIN, PORCINE (PF) 10 UNIT/ML INTRAVENOUS SYRINGE; ALTEPLASE 2 MG INTRA-CATHETER SOLUTION                         | 3     |
| HEPARIN, PORCINE (PF) 10 UNIT/ML INTRAVENOUS SYRINGE; CLOPIDOGREL 75 MG TABLET                                       | 2     |
| Grand Total                                                                                                          | 42    |

\*exclusion of these data did not materially affect the results

**Table 1C. Characteristics of patients according to intensity of anticoagulation\***

| Predictors                                 | Prophylactic Anticoagulant (%)<br>n=333 | Therapeutic Anticoagulant (%)<br>n=601 | p-value |
|--------------------------------------------|-----------------------------------------|----------------------------------------|---------|
| Age>60                                     | 54.05                                   | 57.40                                  | 0.323   |
| Current Cancer                             | 15.92                                   | 14.98                                  | 0.702   |
| Previous VTE                               | 0.30                                    | 0.17                                   | 0.672   |
| Lower Limb Paralysis                       | 0.60                                    | 0.83                                   | 0.695   |
| Thrombophilia                              | 0.30                                    | 2.16                                   | 0.025   |
| ICU Stay (yes)                             | 24.62                                   | 32.95                                  | 0.008   |
| Immobility >7 days                         | NA                                      | NA                                     | NA      |
| GFR 30-59                                  | 12.61                                   | 9.65                                   | 0.161   |
| Age 40-84                                  | 78.98                                   | 80.03                                  | 0.701   |
| Rheumatic diseases                         | 6.01                                    | 7.65                                   | 0.347   |
| Central Venous Catheter                    | 28.83                                   | 30.45                                  | 0.604   |
| Severe Renal Failure GFR<30                | 2.40                                    | 3.33                                   | 0.427   |
| Hepatic failure                            | 1.50                                    | 1.00                                   | 0.495   |
| Age>=85                                    | 6.91                                    | 6.66                                   | 0.883   |
| Platelet count <50.10 <sup>2</sup> cells/L | 0.30                                    | 0.67                                   | 0.464   |
| Bleeding before admission                  | 1.20                                    | 2.16                                   | 0.292   |
| Male                                       | 43.84                                   | 56.07                                  | 0.000   |
| Active gastro ulcer                        | 0                                       | 0                                      | NA      |
| VTE_outcome (yes)                          | 1.53                                    | 3.94                                   | 0.044   |
| Bleed_outcome (yes)                        | 0.31                                    | 1.72                                   | 0.067   |

*\*Table provides supporting evidence for excluding patients admitted to hospital while receiving intermediate/therapeutic anticoagulation. Not surprisingly, the patients on higher intensity anticoagulation were somewhat different from those not receiving anticoagulants on admission. Specifically, the group of patients receiving high-intensity anticoagulation were admitted more often to ICU (33% vs 25%; $p=0.008$ ), included more patients with thrombophilia (2.16% vs. 0.3%;  $p=0.025$ ) and were more often males (56% vs. 44%;  $p<0.001$ ). As expected, this group- considered at high risk of VTE- also had more VTE events than patients on a prophylactic dose of anticoagulants (3.94% vs. 1.53%;  $p=0.044$ ) and more bleeding events (1.72% vs. 0.31%; $p=0.067$ ).*

### Appendix 3

### VTE and bleeding outcomes by prophylactic treatment and IMPROVE prognostic scores.

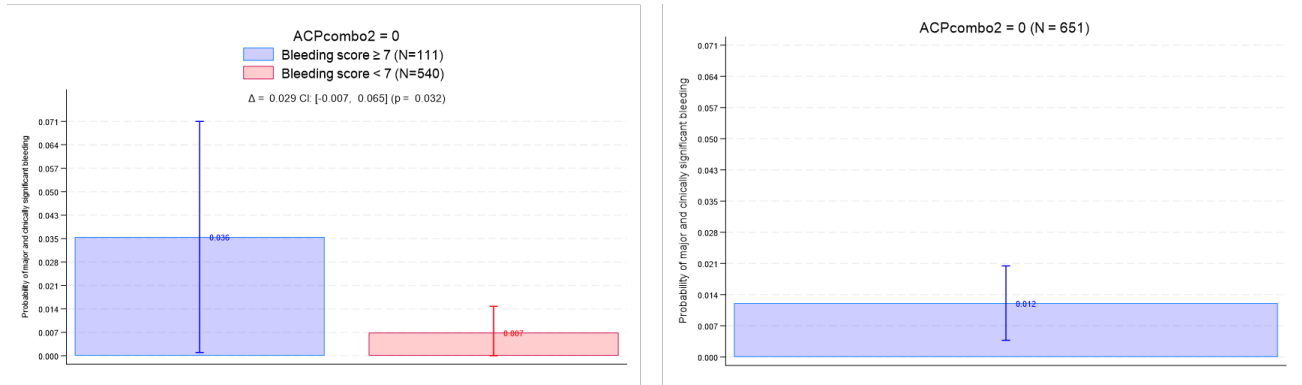

App 3 Fig 1a

[ACPCCombo2 = 0, the patients did not receive prophylactic treatment.

Prophylactic treatment is defined as the patients who received prophylactic dose of enoxaparin and/or aspirin- see manuscript for definitions]

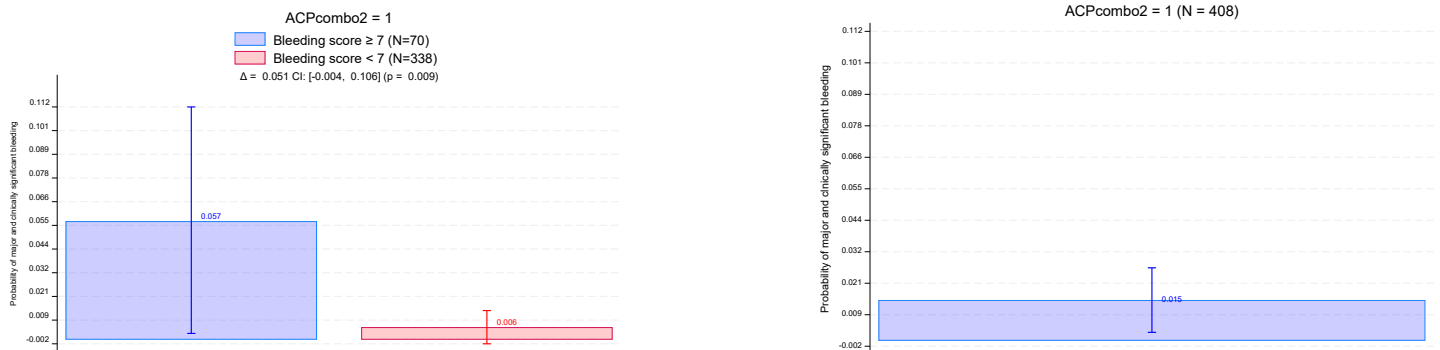

App 3 Fig 1b

[ACPCCombo2 = 1, the patients received prophylactic treatment.

Prophylactic treatment is defined as the patients who received prophylactic dose of enoxaparin and/or aspirin- see manuscript for definitions]

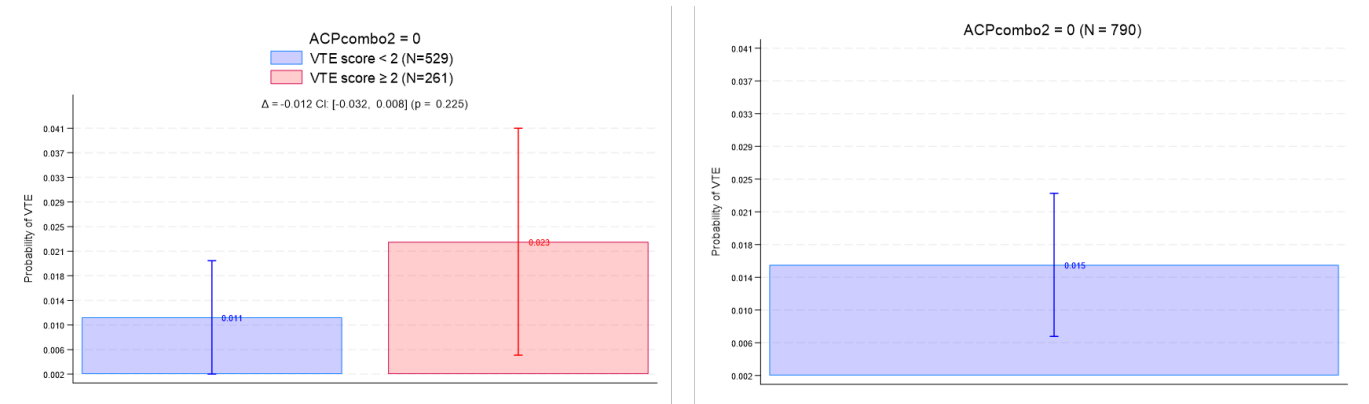

### App 3 Fig 1c

[ACPCombo2 = 0, the patients did not receive prophylactic treatment.

Prophylactic treatment is defined as the patients who received a prophylactic dose of enoxaparin and/or aspirin- see manuscript for definitions]

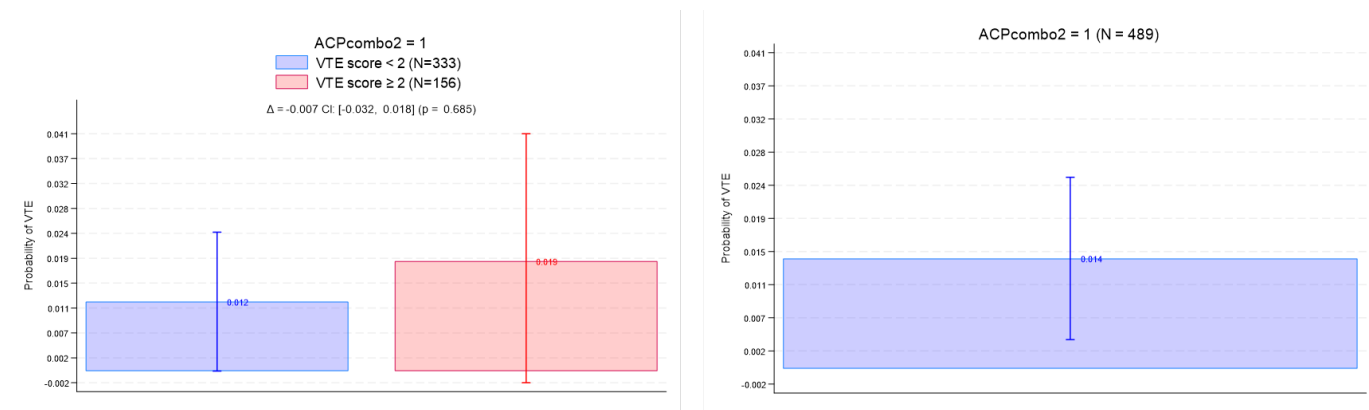

### App 3 Fig 1d

[ACPCombo2 = 1, the patients received prophylactic treatment.

Prophylactic treatment is defined as the patients who received prophylactic dose of enoxaparin and/or aspirin- see manuscript for definitions]

# Appendix 4 Validation of IMPROVE risk assessment models

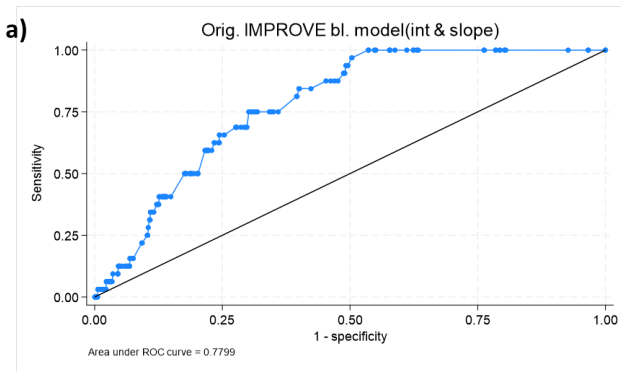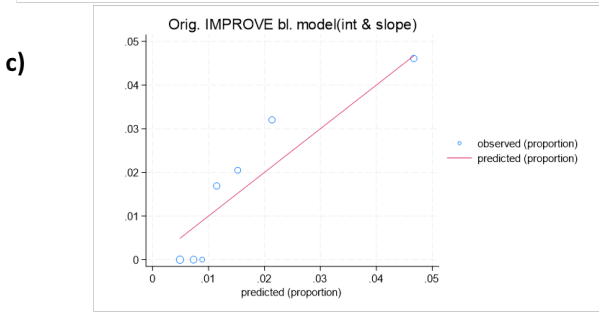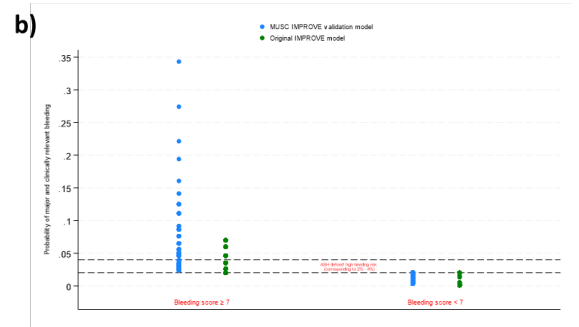

d)

```

===== UpdatedImproveBleed1 =====
Group  N      Obs (%)      Exp (%)      Min %      Max %      HL
1       380      0 (0.0)      1.9 (0.5)      0.3       0.5       1.87
2       333      0 (0.0)      2.4 (0.7)      0.6       0.8       2.45
3       162      0 (0.0)      1.4 (0.9)      0.8       0.9       1.45
4       296      5 (1.7)      3.4 (1.1)      0.9       1.3       0.77
5       244      5 (2.0)      3.7 (1.5)      1.3       1.7       0.45
6       281      9 (3.2)      6.0 (2.1)      1.7       2.5       1.54
7       282     13 (4.6)     13.2 (4.7)     2.5      34.3      0.00
Total   1978     32 (1.6)     32.0 (1.6)     0.3      34.3      8.53

number of observations = 1978
number of groups = 7
 Hosmer-Lemeshow chi2(?) = 8.53
 Prob > chi2 = 0.2878

=====
Obs      ROC      Asymptotic normal
area     std. err.  [95% conf. interval]
=====
1,978   0.7799   0.0282      0.72459   0.83523
    
```

Fig 1.1. External validation of IMPROVE bleeding risk assessment model

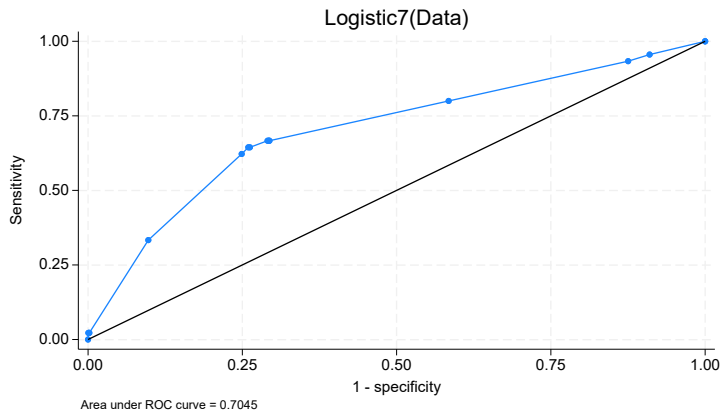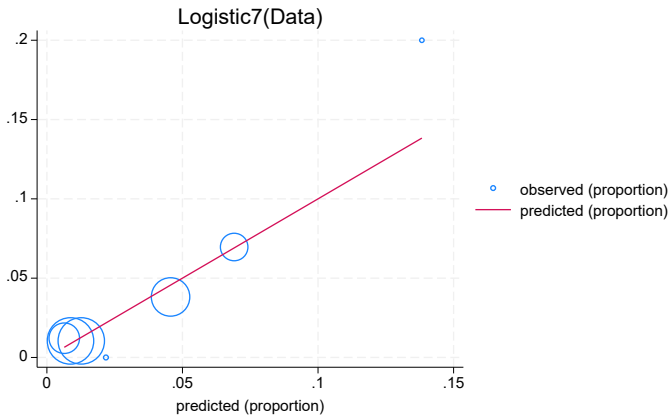

| Group | N    | Obs (%)  | Exp (%)    | Min % | Max % | HL   |
|-------|------|----------|------------|-------|-------|------|
| 1     | 247  | 3 (1.2)  | 1.6 (0.6)  | 0.6   | 0.8   | 1.27 |
| 2     | 575  | 6 (1.0)  | 5.0 (0.9)  | 0.9   | 0.9   | 0.20 |
| 3     | 574  | 6 (1.0)  | 7.3 (1.3)  | 1.3   | 1.3   | 0.23 |
| 4     | 6    | 0 (0.0)  | 0.1 (2.2)  | 1.6   | 2.5   | 0.13 |
| 5     | 393  | 15 (3.8) | 17.9 (4.6) | 3.2   | 4.8   | 0.50 |
| 6     | 201  | 14 (7.0) | 13.9 (6.9) | 6.9   | 6.9   | 0.00 |
| 7     | 5    | 1 (20.0) | 0.7 (13.8) | 8.7   | 17.5  | 0.16 |
| Total | 2001 | 45 (2.2) | 46.5 (2.3) | 0.6   | 17.5  | 2.49 |

number of observations = 2001  
 number of groups = 7  
 Hosmer-Lemeshow chi2(7) = 2.49  
 Prob > chi2 = 0.9276  
 (note: graph HLMoDeLLRVTE7 not found)

| Obs   | ROC area | Std. err. | Asymptotic normal [95% conf. interval] |         |
|-------|----------|-----------|----------------------------------------|---------|
| 2,001 | 0.7045   | 0.0430    | 0.62018                                | 0.78878 |

Fig 1.2. Internal validation of IMPROVE VTE risk assessment model

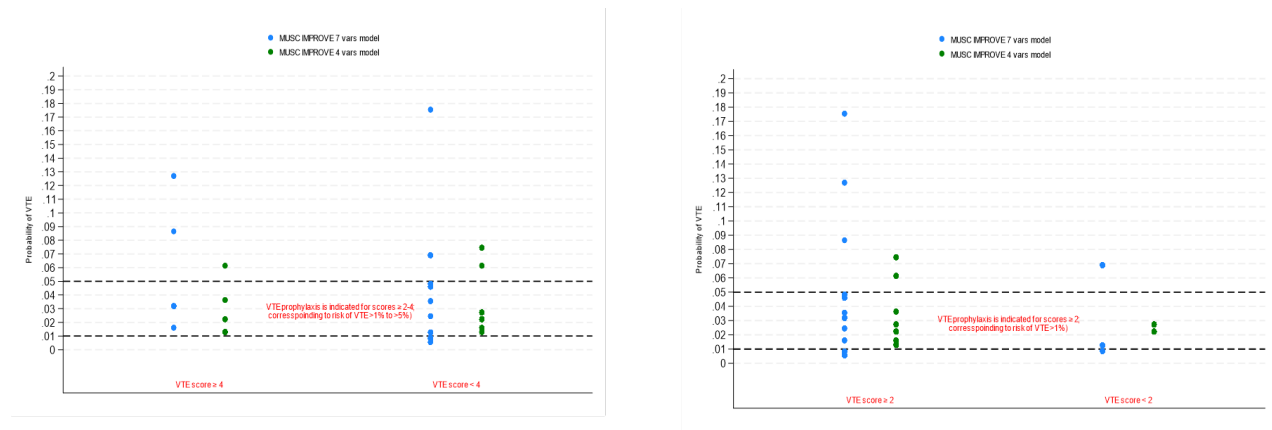

Fig 1.3 Probability of VTE as a function of IMPROVE scores



# App 5 Best Evidence Approach Sensitivity Analysis

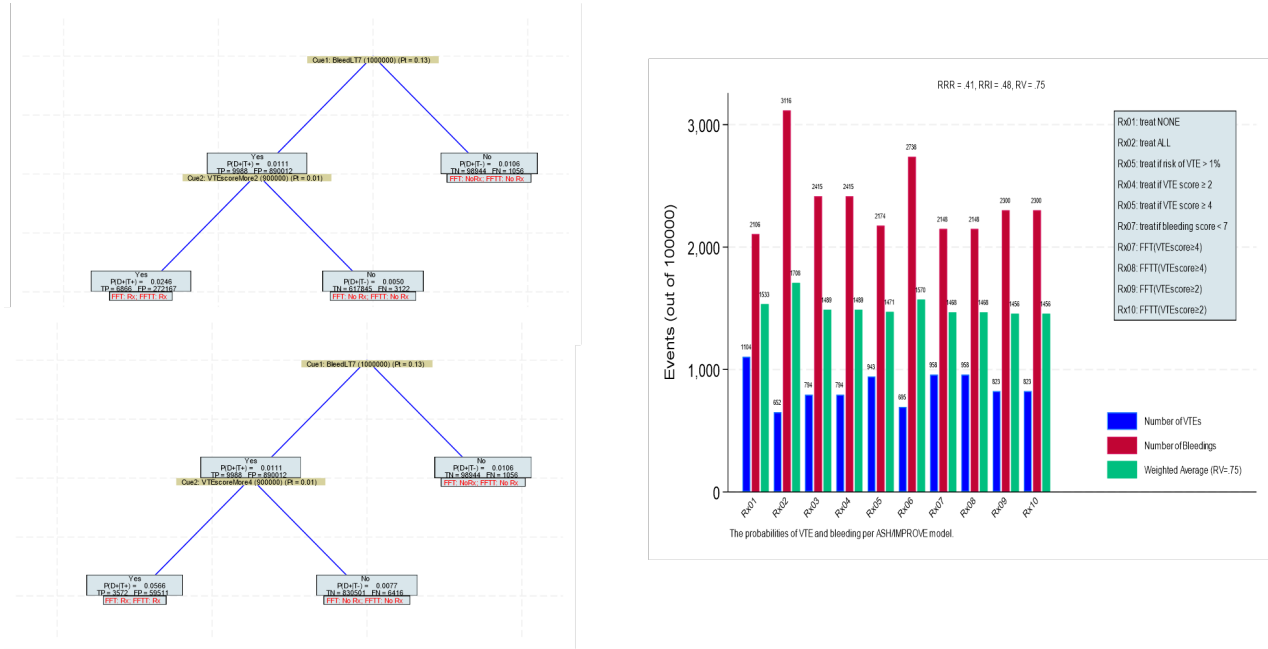

Fig 1.1 Best evidence approach impact analysis: effect of RV=0.75

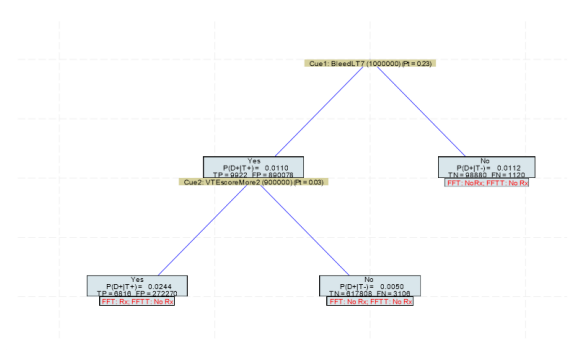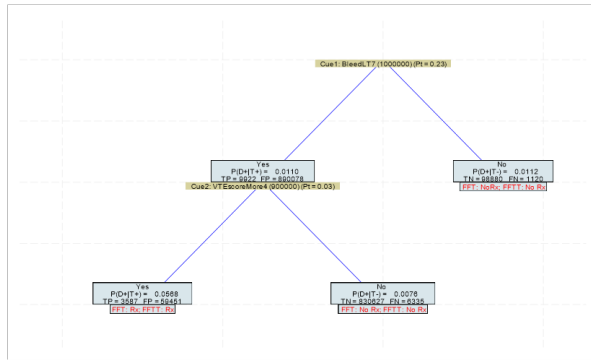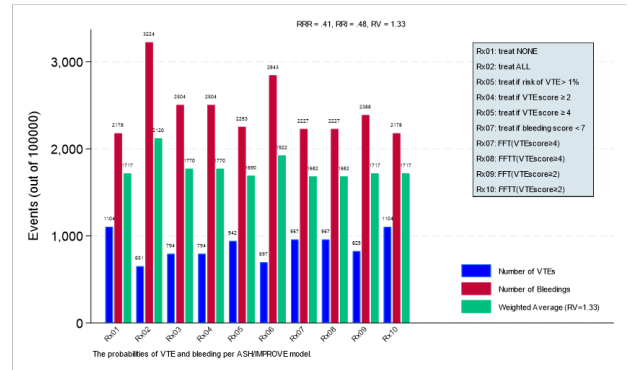

Fig 1.2 Best evidence approach impact analysis: effect of RV=1.33

App 6. Learning health systems [best evidence (ASH)+ MUSC data; probabilities for VTE assumes scores 0 and 1;  $\geq 2$ ] sensitivity analyses

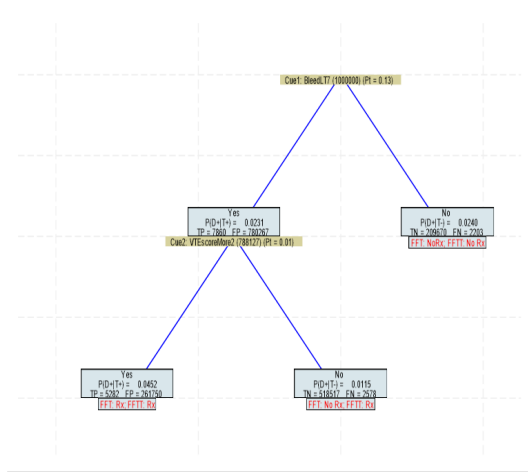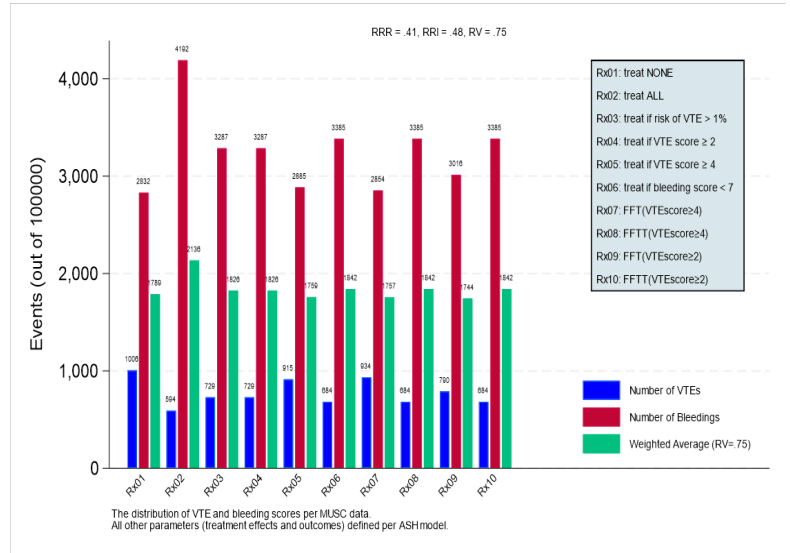

Fig 1.1. Learning health systems approach impact Analysis: effect of RV=0.75

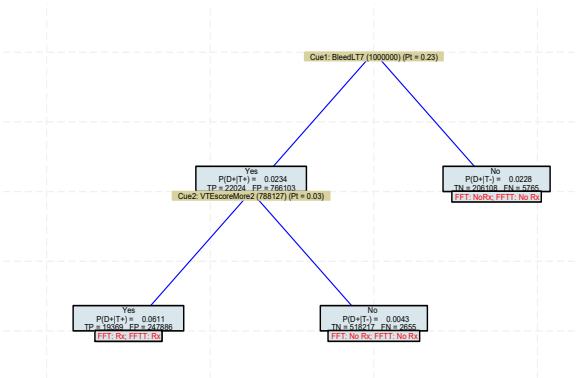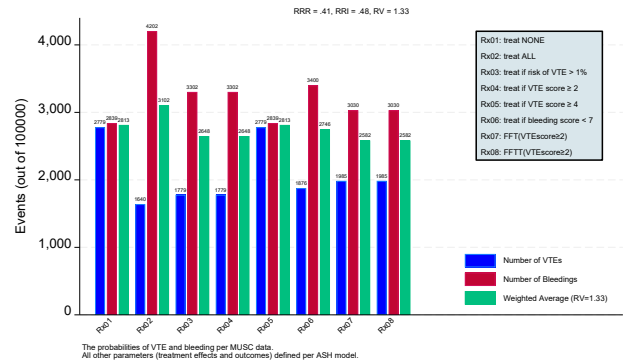

Fig 1.2. Learning health systems approach impact Analysis: effect of RV=1.33

# App 7. Real-world MUSC data sensitivity analyses

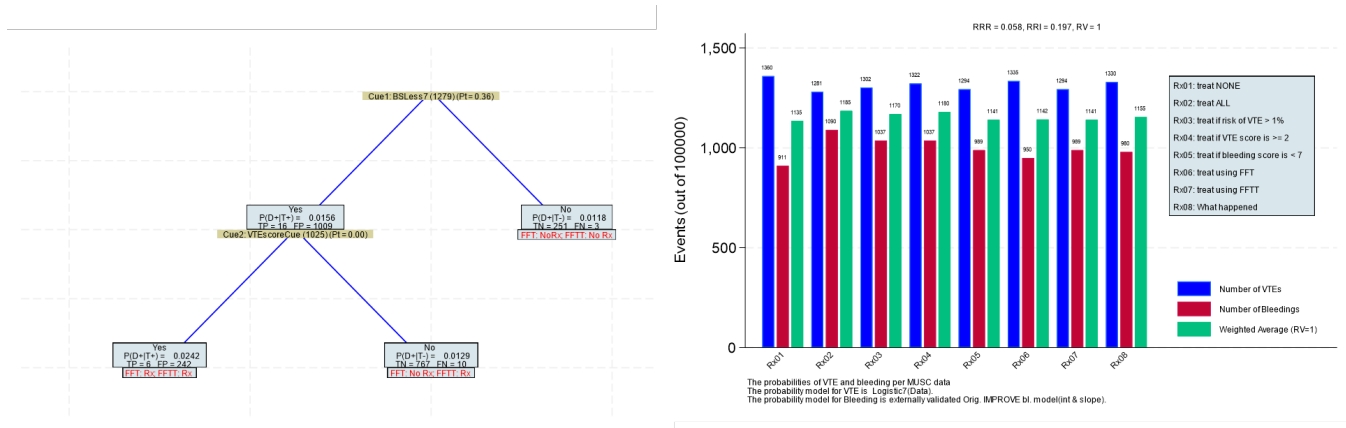

Fig 1.1. Real-world MUSC data sensitivity analyses: effect of RV=1

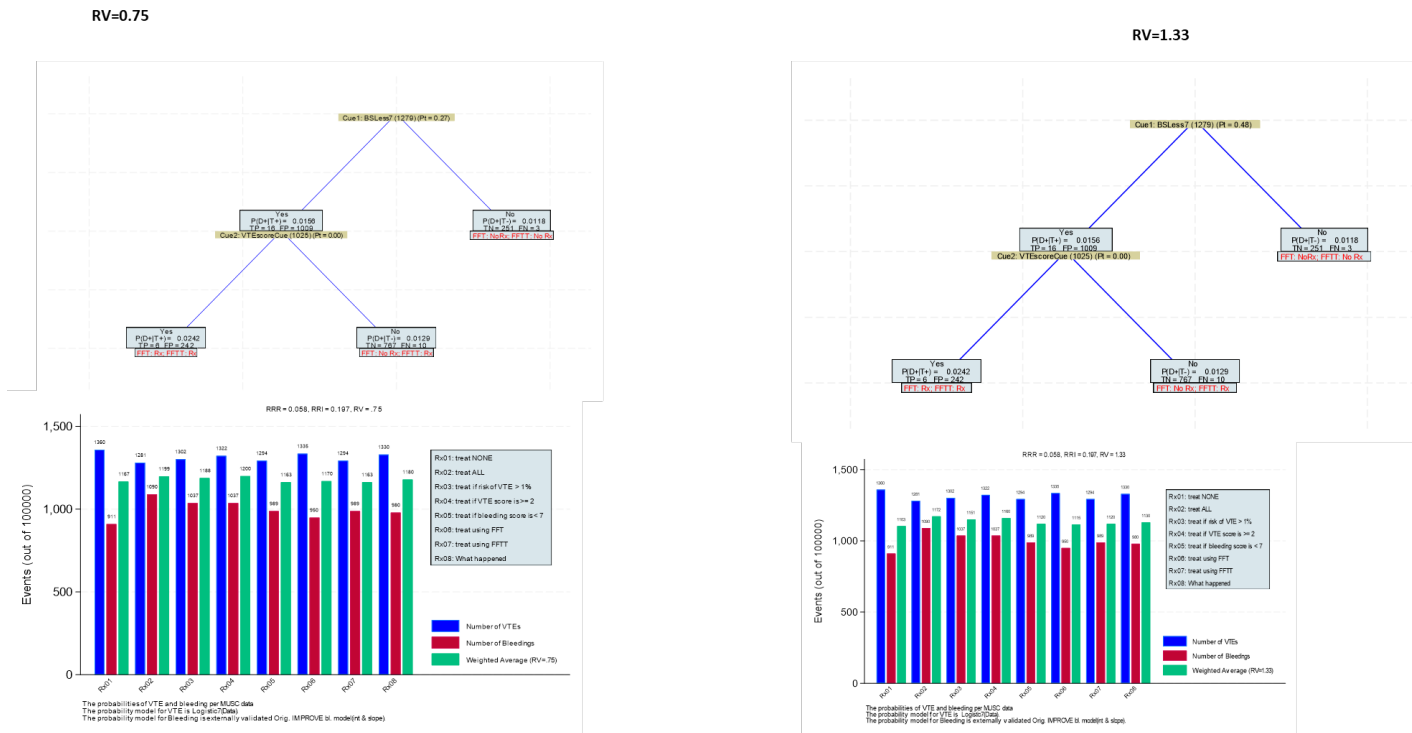

Fig 1.2. Real-world MUSC data sensitivity analyses: effect of RV=0.75 and 1.33

**Fig 2 Sensitivity analysis: considering major bleeding only\***

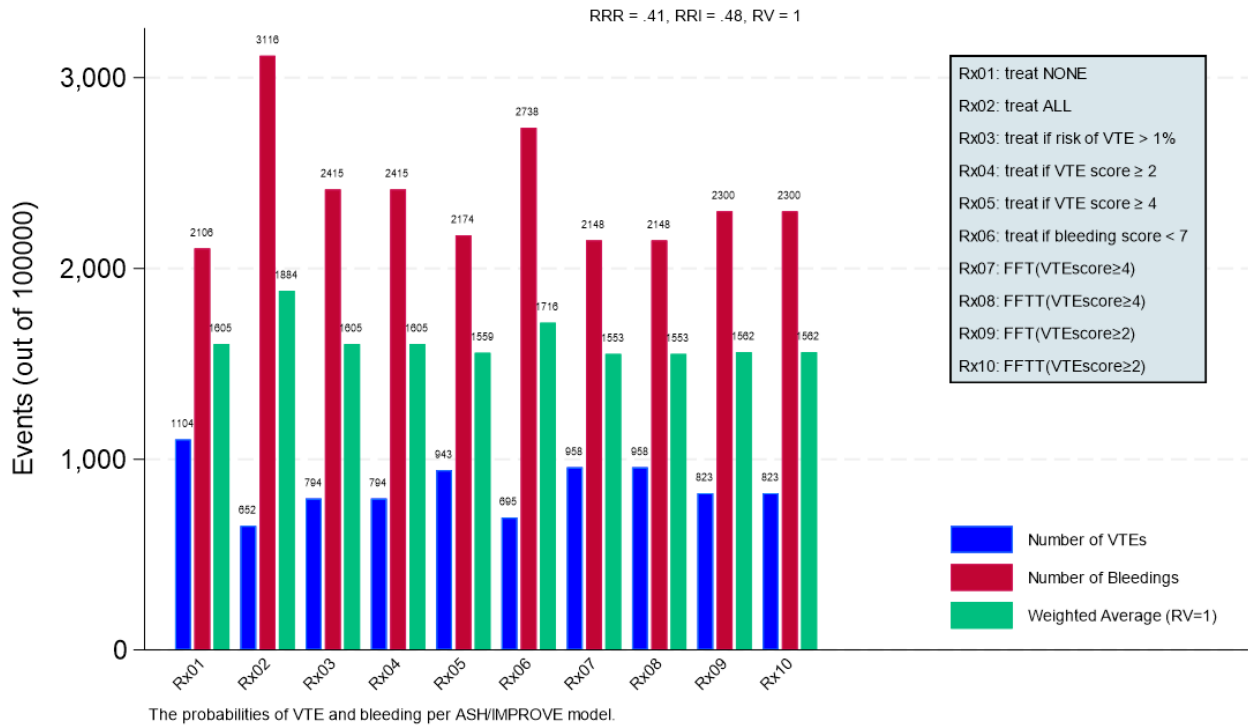

\*The strategies Rx09 and Rx10 (FFT based on IMPROVE VTE score ≥ 2) are best strategies for VTE prophylaxis if only major bleeding was considered in the analysis

## Appendix 8

### Calculation of unnecessary costs/wasted resources

We calculated current costs = bleed\_outcome<sub>14</sub>\*11,189\*1.88 + vte\_outcome<sub>90</sub>\*14,263\*1.42 + VTEprophylaxis\*Hosp\_stay\_days\*2.63 + Hosp\_stay\_days\*2511

where 11,189 refers to direct major bleeding costs reported by O'Brien and Caro<sup>7</sup>, and 14,263 refers to 30 days VTE-related total medical costs as reported by Lin et al<sup>8</sup>; 1.88 and 1.42 represent inflation conversion factors to January 2024 dollars; \$2.63 daily costs of enoxaparin at prophylactic dose; \$2,511 represent a daily cost for staying in a hospital in South Carolina (<https://www.benzinga.com/money/average-cost-of-hospital-stays-with-and-without-medicare>)

We define unnecessary costs as those related to VTE prophylaxis (overuse)= VTE prophylaxis is given for bleeding score  $\geq 7$  or VTE score  $< 2$ , and failure to give VTE prophylaxis (underuse) = VTE prophylaxis is NOT given if VTE score  $\geq 2$  and bleeding score  $< 7$ .

Thus, as shown in the figure, Unnecessary Costs = Current Costs - Required Costs

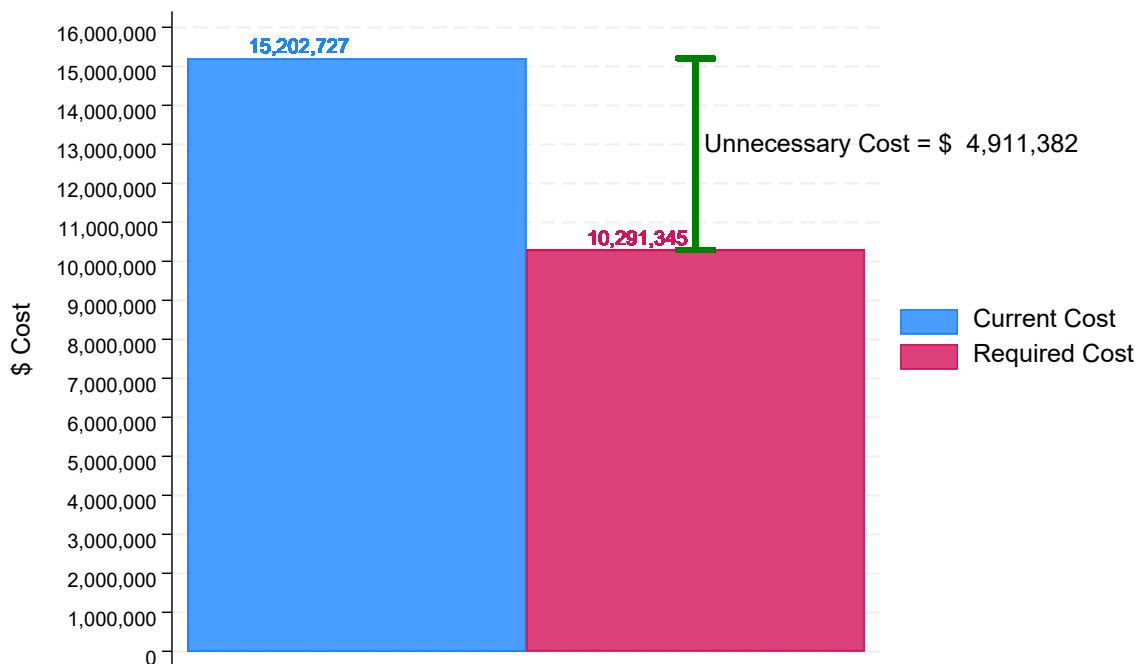

Fig 1. Calculations of unnecessary costs (per year for our MUSC cohort).

## References

1. Schunemann HJ, Cushman M, Burnett AE, et al. American Society of Hematology 2018 guidelines for management of venous thromboembolism: prophylaxis for hospitalized and nonhospitalized medical patients. *Blood Adv*. Nov 27 2018;2(22):3198-3225. doi:10.1182/bloodadvances.2018022954
2. Rezende SM, Bauer KA, Zakai NA. Thromboprophylaxis in hospitalized and nonhospitalized medical patients: what's new? *Blood Advances*. 2023;7(18):5199-5201. doi:10.1182/bloodadvances.2023010067
3. Spyropoulos AC, Anderson FA, Jr., FitzGerald G, et al. Predictive and associative models to identify hospitalized medical patients at risk for VTE. *Chest*. Sep 2011;140(3):706-714. doi:10.1378/chest.10-1944
4. Decousus H, Tapson VF, Bergmann JF, et al. Factors at admission associated with bleeding risk in medical patients: findings from the IMPROVE investigators. *Chest*. Jan 2011;139(1):69-79. doi:10.1378/chest.09-3081
5. Djulbegovic B, Hozo I. *Threshold Decision-making in Clinical Medicine with Practical Application to Hematology and Oncology*. Cancer Treatment and Research. Springer Nature Switzerland AG; 2023:XXIII, 138.
6. Djulbegovic B, Hozo I, Cuker A, Guyatt G. Improving methods of clinical practice guidelines: From guidelines to pathways to fast-and-frugal trees and decision analysis to develop individualised patient care. *J Eval Clin Pract*. Dec 10 2023;doi:10.1111/jep.13953
7. O'Brien JA, Caro JJ. Direct Medical Cost of Managing Deep Vein Thrombosis According to the Occurrence of Complications. *PharmacoEconomics*. 2002/08/01 2002;20(9):603-615. doi:10.2165/00019053-200220090-00004
8. Lin J, Lingohr-Smith M, Kwong WJ. Incremental health care resource utilization and economic burden of venous thromboembolism recurrence from a U.S. payer perspective. *J Manag Care Pharm*. Feb 2014;20(2):174-86. doi:10.18553/jmcp.2014.20.2.174
